# Supplementary material for: Healthy offshore workforce? A qualitative study on offshore wind employees’ occupational strain, health, and coping
Source: BMC Public Health. 2018 Jan 23;18:172. doi: 10.1186/s12889-018-5079-4 (PMC5781334; doi:10.1186/s12889-018-5079-4)
Supplement: Additional file 1: — Questions of the interview guideline. (PDF 182 kb) [file 12889_2018_5079_MOESM1_ESM.pdf]

## **Additional file 1: Questions of the interview guideline**

### **Occupational strain and health**

1. *“Do you feel that your job demands have an impact on your health? If so, what kind of impact?”*
2. *“Are there particular aspects of your work that you would judge as harmful to your health?”*
3. *“Do you view the impacts on your health as rather short-term or long-term?”*
4. *“How do you manage to mentally detach from work after your shifts?”*
5. *“Do you feel that there is a clear boundary between your work times and your free time in the evenings when you’re offshore?”*
6. *“Are there particular phases or days during your offshore assignments when you feel especially fatigued? [psychologically / physically]”*
7. *“How do you rate your sleep quality during your offshore assignments (compared to your normal sleep quality onshore)?”*
8. *“Are there particular aspects of the offshore environment that have a negative or positive influence on your sleep quality?”*

### **Coping strategies**

1. *“How do you deal with the demands of your work?”*
2. *“Do you have specific strategies in order to better deal with your job demands?”*
3. *“What do you do to recover from your work when you are offshore?”*
